# Supplementary material for: A Small Cellulose-Binding-Domain Protein (CBD1) in Phytophthora is Highly Variable in the Non-binding Amino Terminus
Source: Springer Nature journal article supplement (doi:10.1007/s00284-017-1315-x), 2017-07-26
Supplement: MOESM1 [file 284_2017_1315_MOESM1_ESM.pdf]

A small cellulose binding domain protein (CBD 1) in *Phytophthora* is highly variable in the nonbinding amino terminus. *Current Microbiology*. R. Jones and F. Perez, USDA-ARS Beltsville, MD 20705.  
 Richard.jones@ars.usda.gov

Table 1. Identification of isolates used to obtain CBD gene sequences. Isolates are maintained at the Beltsville International *Phytophthora* Collection.

| <u>Isolate</u> | <u>Country</u>   | <u>Location</u> |
|----------------|------------------|-----------------|
| AN10-98        | Sweden           | Uppsala         |
| AN6-98         | Sweden           | Uppsala         |
| BL2009P1       | USA              | Pennsylvania    |
| CIP393-A       | Ecuador          |                 |
| CIP393-C       | Ecuador          |                 |
| DS-066         | USA              | Florida         |
| DS-150         | USA              | Florida         |
| EC1021         | Ecuador          |                 |
| EC1903         | Ecuador          |                 |
| EC2968         | Ecuador          |                 |
| EC3189         | Ecuador          |                 |
| EC3210         | Ecuador          |                 |
| FL06-102       | USA              |                 |
| FL06-118       | USA              |                 |
| Jer 88         | United Kingdom   | Jersey Island   |
| Jer24          | United Kingdom   | Jersey Island   |
| Jer76          | United Kingdom   | Jersey Island   |
| Jer79          | United Kingdom   | Jersey Island   |
| Jer80          | United Kingdom   | Jersey Island   |
| MD09-K-ASS-3   | USA              | Maryland        |
| ME06-VG-M      | USA              | Maine           |
| Mex260-P       | Mexico           |                 |
| MexR8-E        | Mexico           |                 |
| NC09-2A-a      | USA              | North Carolina  |
| NI21/93        | Northern Ireland |                 |
| NI28/05        | Northern Ireland |                 |
| NI46/02        | Northern Ireland |                 |
| NI64/02        | Northern Ireland |                 |
| NI-ORLA-4E     | Northern Ireland |                 |
| OEB15          | France           |                 |
| Pek21          | France           |                 |
| pi-02-007      | USA              | Michigan        |

|              |                  |          |
|--------------|------------------|----------|
| pi-410       | Taiwan           |          |
| pi-428       | Taiwan           |          |
| pi-49        | Taiwan           |          |
| pi-609       | Taiwan           |          |
| pi-670       | Taiwan           |          |
| pi-Nepal-2   | Nepal            |          |
| pi-Thai-2    | Thailand         |          |
| Sante BL1/02 | Northern Ireland |          |
| SR83-84      | USA              | Michigan |
| UR99-28      | Uruguay          |          |
| UR99-4       | Uruguay          |          |
| US940501     | USA              | New York |
| VA09-3-a     | USA              | Virginia |
| WL98-206     | United Kingdom   | Wales    |
| WL98-234     | United Kingdom   | Wales    |

---

Table 2. Species identification and gene or genomic region harboring the CBD1 encoding gene.

| <u>Isolate</u>               | <u>GenBank identifier</u> |
|------------------------------|---------------------------|
| Phytophthora agathidicida    | LGTR01000106              |
| Phytophthora alni susp. alni | AUPN01239998              |
| Phytophthora cambivora       | AUVH01059526              |
| Phytophthora capsici         | LGTR01000106              |
| Phytophthora cinnamomi       | LGSK01000118              |
| Phytophthora cryptogea       | AUWJ02028117              |
| Phytophthora fragariae       | JHVZ03000053              |
| Phytophthora kernoviae       | AOFJ02000752              |
| Phytophthora lateralis       | AMZP02007804              |
| Phytophthora nicotianae      | LNFP010000335             |
| Phytophthora parasitica      | XM_008915048              |
| Phytophthora pisi            | CCEW01002060              |
| Phytophthora pluvialis       | LGTT01001527              |

|                      |              |
|----------------------|--------------|
| Phytophthora ramorum | AAQX01000195 |
| Phytophthora rubi    | JMRJ01022618 |
| Phytophthora sojae   | XM_009538327 |
| Plasmopara halstedii | CCYD01000645 |
