# Supplementary material for: A Small Cellulose-Binding-Domain Protein (CBD1) in Phytophthora is Highly Variable in the Non-binding Amino Terminus
Source: Springer Nature journal article supplement (doi:10.1007/s00284-017-1315-x), 2017-07-26
Supplement: MOESM2 [file 284_2017_1315_MOESM2_ESM.pdf]

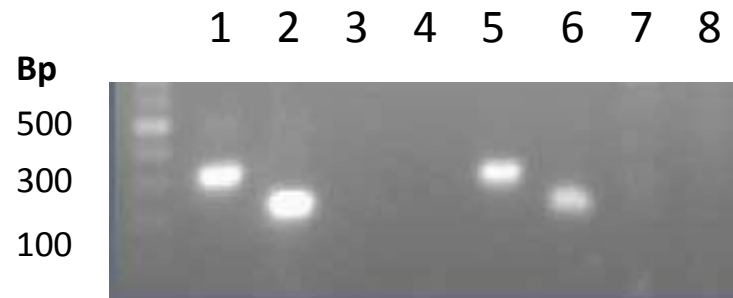

A small cellulose binding domain protein (CBD 1) in *Phytophthora* is highly variable in the nonbinding amino terminus. *Current Microbiology*. R. Jones and F. Perez, USDA-ARS Beltsville, MD 20705. [Richard.jones@ars.usda.gov](mailto:Richard.jones@ars.usda.gov)
